**A study on the protective effects of CpG ODN-induced mucosal immunity  
against lung injury in a mouse ARDS model**

Running title: Protection effect of Mucosal Immunity on ARDS

Guan Wang MD<sup>1,2</sup>, Zong-Jian Liu PhD<sup>3</sup>, Xuan Liu PhD<sup>3</sup>, Feng-Ge Liu MD<sup>2</sup>, Yan Li MD<sup>2</sup>, Yi-Bing Weng MD<sup>2\*</sup>, Jian-Xin Zhou PhD<sup>1\*</sup>

<sup>1</sup>Department of Critical Care Medicine, Beijing Tian Tan Hospital, Capital Medical University, Beijing 100050, China

<sup>2</sup>Department of Critical Care Medicine, Beijing Luhe Hospital, Capital Medical University, Beijing 101100, China

<sup>3</sup>Center Laboratory, Beijing Luhe Hospital, Capital Medical University, Beijing 101100, China

\*Corresponding author

Jian-Xin Zhou

Department of Critical Care Medicine,

Beijing Tian Tan Hospital, Capital Medical University,

No. 6 of TianTan Xili, Dongcheng District,

Beijing 100050,

China

Tel: +8610 6709 8019

Fax: +8610 6709 8019

E-mail: jianxinzhoudr@163.com

Yi-Bing Weng

Department of Critical Care Medicine,

Beijing LuHe Hospital, Capital Medical University,

No. 82 of XinHua South Road, TongZhou District,

Beijing 101100,

China

Tel: +8610 6954 3901-2128

Fax: +8610 6954 3901

## **Abstract**

This study aims to determine the feasibility of using oligodeoxynucleotides with unmethylated cytosine-guanine dinucleotide sequences (CpG ODN) as an immunity protection strategy for a mouse model of acute respiratory distress syndrome (ARDS). This is a prospective laboratory animal investigation. 20-week old BALB/c mice in Animal research laboratory were randomized into groups. An ARDS model was induced in mice using lipopolysaccharides. CpG ODN was intranasally and transrectally immunized before or after the 3<sup>rd</sup> and 7<sup>th</sup> day of establishing the ARDS model. Mice were euthanized on day seven after the 2<sup>nd</sup> immunization. Then, retroorbital bleeding was carried, out and the chest was rapidly opened to collect the trachea and tissues from both lungs for testing. CpG ODN significantly improved the pathologic impairment in mice lung, especially after the intranasal administration of 50 ug. This resulted in the least severe lung tissue injury. Furthermore, IL-6 and IL-8 concentrations were lower, which was second to mice treated with the rectal administration of 20 µg CpG ODN. In contrast, the nasal and rectal administration of CpG ODN in BALB/c mice before LPS immunization did not appear to exhibit any significant protective effects. In conclusion, the intranasal administration of CpG ODN may be is a potential treatment approach to ARDS. More studies are needed to further determine the protective mechanism of CpG ODN.

**Keywords** : animal model of human disease; acute respiratory distress syndrome; CpG ODN; mucosal immunity; immunity routes; protection

## **Introduction**

Acute respiratory distress syndrome (ARDS) is a commonly observed critical

illness with a rapid onset and high mortality rate (Rubenfeld, et al., 2005). Its main pathophysiological characteristics are increased pulmonary capillary permeability, pulmonary edema, pulmonary hyaline membrane changes, and pulmonary fibrosis (ARDS Definition Task Force, et al., 2012). The pathogenesis of ARDS is presently not completely clear (Han S and Mallampalli RK, 2015). At present, drug treatments are used to control this injury, but do not produce ideal outcomes (Anzueto A, et al., 1996; Dellinger RP, et al., 1998; Iwata K, et al., 2010; National Heart, Lung, and Blood Institute Acute Respiratory Distress Syndrome (ARDS) Clinical Trials Network, et al., 2011; National Heart, Lung, and Blood Institute ARDS Clinical Trials Network, et al., 2014; Rice TW, et al., 2011; Paine R 3rd, et al., 2012; Peter JV, et al., 2008), while some biological therapies are presently in the experimental or clinical trial phase (Boyle AJ, et al., 2014), and the efficacy remains to be determined. Considering that ARDS inflammatory responses mainly occur on the mucosal surfaces of the lungs (alveoli, and pulmonary capillary membranes), limiting or eliminating these responses may decrease the severity of lung tissue injury and shorten the duration of inflammatory responses, thereby preventing the occurrence or development of ARDS. Therefore, the investigators considered the possibility of whether mucosal immunity can play a limiting or eliminating role in preventing the occurrence or development of ARDS.

Mucosal immunity refers to the immune system present on the mucosa itself, which is different from systemic immunity. The route by which mucosal immunity is produced can be summarized as follows: After M cells on Peyer's patches in the mucosal surfaces have engulfed the antigens, these migrate to the submucosa and deliver unmodified antigen to dendritic cells (DCs). Then, these DCs modify the antigens, and present these to T and B lymphocytes that have migrated from the blood

vessels. After these B lymphocytes are sensitized by antigens, these differentiate into plasma cells and secrete large amounts of monomeric immunoglobulin A (IgA) to the mucosal surface. This monomeric IgA forms polymeric IgA through the binding of J chains to neutralize more pathogens. In contrast, sensitized T lymphocytes produce interleukin (IL)-2, IL-4, IL-5, IL-6, IL-8 and IL-10, and other cytokines, which can all stimulate B-cells to produce IgA. In addition, activated B cells may induce mucosal immunity in multiple distal sites through their homing route. Therefore, DC-activated B-cells and T-cells, and IgA all constitute the mucosal defense system, and play roles in neutralizing and eliminating pathogens (Dennehy PH, 2005; Featherstone C, 1997; Katial RK, et al., 2002; Lundholm P, 2002; Maxim RB, 2002). The activation pathways commonly used in mucosal immunity involve the nasal mucosa or rectal mucosa. Recent studies have shown that oligodeoxynucleotides with unmethylated cytosine-guanine dinucleotide sequences (CpG ODN) are good protective agents for mucosal immunity, and can regulate coagulation defects caused by endothelial injury (El Kebir D, et al., 2015; Li Lina, 2010; Li Xuan, 2014; Reiss LK, et al., 2012).

In summary, the nasal and rectal administration of CpG ODN was carried out in a mouse ARDS model, in order to evaluate the degree of lung injury, and understand whether the induction of mucosal immunity has a protective effect on lung injury in ARDS.

## **Materials and Methods**

### **Animals**

The study is a mouse' animal experiment that was approved by the center of experiment animal ethics committee, Capital Medical University (Approval No.: AEEI-2017-138). CpG ODN, specific pathogen free (SPF)-grade 20-week old

BALB/c mice (approval number: SCXK(Jing)2016-0011), weighing 24-26 grams with equal number of males and females, were randomized into groups. Then, CpG ODN (TCCATGACGTTCTGACGTT) was synthesized, and the entire sequence was modified with phosphonothioate, and phosphorylated at both ends (Sangon, Shanghai, China). The lipopolysaccharide (LPS) was purchased from Sigma Inc. (Sigma, Missouri, United States).

### **Grouping**

Forty-five BALB/C mice were randomized into nine experimental groups (A–J). Before the start of the experiment, blood was collected from the tail vein as a blank control (Table 1).

### **Generation of the ARDS model** (Aeffner F, et al., 2015)

Mice in groups B–F were first used to generate the ARDS models. After intraperitoneal injection of 50 mg/kg pentobarbital sodium for anesthesia, a 1.5-cm incision was made at 2 cm above the sternum to expose the trachea. Then, a microinjector was used for intratracheal instillation with 70 µg/kg of LPS to cause injury and generate the model. An absorbable suture was used, and the incision was rapidly sutured before iodophor disinfection. Mice in groups G–J initially received CpG ODN before ARDS was induced (see below). Group A was assigned as the blank control group, in which only blood and tissue samples were collected for testing, and no treatment was carried out.

### **Immunization method**

On day 3 and 7 after the model was generated, mice in groups C–F were given CpG ODN at 20 µg (intranasally), 50 µg (intranasally), 20 µg (transrectally), and 50

μg (transrectally), respectively. Mice in group B were only used for model generation, and CpG ODN was not administered. Mice in groups G-J received CpG ODN at 20 μg (intranasally), 50 μg (intranasally), 20 μg (transrectally), and 50 μg (transrectally), respectively, on day 1 and 3. Then, the ARDS models were generated on day seven after the 2<sup>nd</sup> immunization, following the above method. Mice were euthanized on day seven after the 2<sup>nd</sup> immunization in groups C-F, at day seven after model generation in groups G-J, and on the same day in group B, before retroorbital bleeding was carried out and the chest was rapidly opened to collect the trachea and tissues in both lungs. The right lung was rapidly placed in a fixative, and sent to the Pathology Department. The left lung and tracheal tissues were rapidly placed in a 4°C solution with trypsin inhibitors, and ultrasonicated. Subsequently, the homogenates were centrifuged in a 4°C low-temperature centrifuge at 12,000 rpm for 30 minutes. Then, the clear supernatant was collected and stored at -80°C for future tests. Each blood sample was centrifuged at 3,000 rpm for 10 minutes, and the clear supernatant was collected and stored at -20°C.

### **Enzyme-linked immunosorbent assay (ELISA)**

The levels of the inflammatory mediators (IL-6 and IL-8) were tested in the serum and tissue supernatants. IL-6 and IL-8 ELISA test kits (AMEKO ELISA Kit, Shanghai, China) were used to quantify the IL-6 and IL-8 concentrations in each sample.

### **Pathological examination of lung tissues**

Hematoxylin and eosin (H&E) staining of lung tissues and lung injury evaluation scores: Conventional paraffin immersion, embedding, sectioning and H&E staining were carried out before the pathological sections were observed under an ordinary

microscope (magnification,  $\times 200$ ). A pathologist was responsible for evaluating the lung injury under a magnification of  $400\times$ . The modified grading scheme of Matute-Bello was used to evaluate the severity of lung injury, according to neutrophils in the alveolar space (S), neutrophils in the interstitial space (T), the proteinaceous debris that filled the airspaces (U), and alveolar septal thickening (V) (Aeffner F, et al., 2015). The total lung injury score was the summation of the aforementioned items. At least 20 high-powered fields ( $400\times$ ) were observed for each sample, and the mean value was taken (Table 2).

### **Statistical methods**

Data were entered in an Excel file. Data organization and statistical analysis was carried out using Microsoft Excel (Microsoft Ltd. USA), SAS 9.4 (SAS Institute Inc., Cary, USA), and other software. Quantitative data that conforms to the normal distribution were presented as mean  $\pm$  standard deviation. Intergroup comparisons were carried out using one-way analysis of variance (ANOVA). Multivariate analysis was carried out using logistic regression. A *P*-value  $<0.05$  was considered statistically significant.

### **Results**

#### **Immunization completion status in mouse in groups A~J**

In group A, all mice survived up to the end-point. In group B, four mice survived up to the end-point (B3 died on the day after the 2<sup>nd</sup> LPS immunization). In group C, five mice survived up to the end-point. In group D, four mice survived up to the end-point (D2 died on the day after the 1<sup>st</sup> LPS immunization). In group E, four mice survived up to the end-point (E2 died on the day after the 1<sup>st</sup> LPS immunization). In



group F, five mice survived up to the end-point. In group G, three mice survived up to the end-point (G1 died on the day after the 1<sup>st</sup> nasal administration of CpG ODN and G3 died on the day after the 1<sup>st</sup> LPS immunization). In group H, three mice survived up to the end-point (H3 and H5 died on the day after the 2<sup>nd</sup> rectal administration of CpG ODN). In group I, four mice survived up to the end-point (I2 died within 10 minutes of the 1<sup>st</sup> LPS immunization). In group J, four mice survived up to the end-point (J4 died on the day after the 1<sup>st</sup> LPS immunization).

### **Mouse ARDS model generation status**

The gross appearance of the isolated lung tissues revealed congestion and edema (Fig. 1A). The pathological sections revealed that various experimental groups exhibited varying degrees of alveolar edema, the infiltration of inflammatory cells, bleeding, and atelectasis (Fig. 1B), which indicated that the ARDS models were successfully generated (Aeffner F, et al., 2015).

### **Mouse lung histopathological examination results**

Group A was assigned as the blank control group. In the pathological sections (100×, 200×, and 400×), the lung tissue structure was clear, the alveolar cavity was clean, the alveolar septum was thin, and there was an absence of interstitial congestion, an absence of neutrophil elevation and migration, and an absence of protein-like substance deposition. Group B was assigned as the LPS-only group. From the pathological sections, it could be observed that the normal structure of lung tissues nearly disappeared, the alveolar cavity was significantly reduced or filled with pink protein-like substances, the alveolar septum was significantly thickened (thickness increased by >4 times compared with group A), and there was interstitial congestion

and large amounts of neutrophil exudates (Fig. 2). The overall lung tissue structure in mice in groups C and D appeared to be significantly damaged, when compared to that in mice in group A. However, the damage was significantly less than that in group B. The lung tissue structures of mice in these two groups were generally intact (slight destruction of the alveolar structure was observed), only small amounts of neutrophil exudates were observed in the alveolar cavity, there was mild thickening of the alveolar septum (the thickness was 2-4 times that of that in group A), and mild congestion and neutrophil exudates were observed in the interstitial spaces. However, the overall pathological damage in mice in group D was slightly milder, when compared to that in mice in group C (pathological evaluation scores: 0.0625 and 0.0990, respectively). The pathological presentation in group E was similar to that in group D, while the pathological presentation in group F was close to that in group C, but had slightly more severe neutrophil exudation, alveolar septal thickness, and degree of interstitial congestion (the evaluation scores for groups E and F were 0.0781 and 0.1024, respectively). The overall pathological evaluation scores in groups G–J (0.0990, 0.0746, 0.0876 and 0.0793, respectively) were better than those in groups C–F. However, with regard to the four groups, protein deposition in the alveolar cavity was significantly greater in group G than in the other three groups, while interstitial lesions and alveolar septal thickening were greater in group J than in the other three groups. In groups C–J, group D and H had the lowest pathological damage scores (0.0625 and 0.0746, respectively), while groups C and G had the highest scores (both, 0.0990) (Table 3, Fig. 3).

## **IL-6 and IL-8 test status**

### **IL-6**

The IL-6 concentrations of various groups of BALB/c mice (including the blank control group) had significant differences before and after LPS immunization ( $P < 0.05$ ). The overall differences in IL-6 concentration after LPS immunization among the groups were statistically significant ( $P < 0.05$ ). Among these groups, the LPS only group (group B) had the highest IL-6 concentration, while group E had the lowest IL-6 concentration. Intergroup comparisons revealed that there were no statistically significant differences among groups C, H and B ( $P > 0.05$ ). Group E exhibited significant differences when compared with groups B, C and H ( $P < 0.005$ ), but no significant difference was found when compared with the other groups ( $P > 0.05$ ) (Table 4, Fig. 4A).

## **IL-8**

IL-8 concentrations among the groups of BALB/c mice (including the blank control group) had significant differences before and after immunization ( $P < 0.05$ ). The overall differences in IL-8 concentration after LPS immunization among the groups were statistically significant ( $P < 0.05$ ). Among these groups, the LPS only group and group H (pre-nasal administration of 50  $\mu\text{g}$  of CpG ODN group) had similar IL-8 concentrations, and these two groups had statistically significant differences when compared with group A (blank control group) ( $P < 0.05$ ). The comparison of concentrations between the other groups revealed no significant differences ( $P > 0.05$ ). In addition, group I (pre-rectal administration of 20  $\mu\text{g}$  of CpG ODN group) had the lowest IL-8 concentration, which was statistically significant when compared with groups B, E and H ( $P < 0.05$ , Table 5, Fig. 4B).

## **Discussion**

Since Ashbaugh (Ashbaugh DG, et al., 1967.) first reported ARDS, the mortality rate of this disease has remained high (Bellani G, et al., 2016). One of the reasons for this is that the pathogenesis of ARDS is very complex. Furthermore, it is also due to the aforementioned inflammatory responses that induce the production of autoimmune responses, which result in damage to other non-related organs and makes treatment more challenging. At present, it is clear that (i) inflammatory responses in ARDS induce mitochondrial damage-associated molecular patterns (DAMPs), which activate alveolar macrophages through Toll-like receptor (TLR) and NOD-like receptor (NLR) pathways. The latter pathway results in the release of inflammatory factors, and mobilizes macrophages and neutrophils in blood to aggregate at damage sites. Excessive neutrophils and persistently activated macrophages result in extensive pulmonary epithelial and endothelial cell damage, which in turn causes damage to the alveolar–capillary barrier. The destruction of this barrier enables protein-rich edema fluid to enter the alveoli, resulting in alveolar fluid accumulation (alveolar edema), thereby affecting normal gaseous exchange. (ii) Ubiquitination plays an important role in regulating key proteins that cause ARDS, since this process can induce the secretion of cytokines (mainly, IL-6, IL-8, IL-1 $\beta$  and TNF), decrease pulmonary surfactant levels, and reduce ion channel function (including Na<sup>+</sup> /K<sup>+</sup> -ATPase channels, and epithelial sodium channel). (iii) The consumption of alveolar surfactants and increased NETosis by neutrophils further worsens pulmonary cellular functions. (iv) DAMPs can also directly cause an increase in vascular permeability without relying on granulocytes, resulting in a repeated cycle of inflammation (Han S and Mallampalli RK, 2015). Since these processes involve multiple immune responses and inflammatory mediators, treatment is difficult. Existing methods are mainly directed against the primary disease, and merely few methods are directed

against lesions in lung tissues. Limiting or eliminating these responses to decrease the severity of lung tissue injury and shortening the duration of inflammatory responses to prevent the occurrence or development of ARDS requires the consideration of whether mucosal immunity can play a role in limiting or eliminating the occurrence or development of ARDS.

The mucosa is an important physiological barrier in the innate immune system, which prevents invasion by pathogenic microorganisms. It constitutes as a physiological barrier and immune protection, since the mucosa itself has its own immune system, termed mucosal immunity. The production of mucosal immunity mainly involves M cells, DCs, T lymphocytes and B lymphocytes. In addition, the aforementioned sensitized B lymphocytes can migrate out of the mucosal sites, in which these are sensitized to pass through lymphatic vessels, the thoracic duct and blood, before returning to its initial sensitization site (this process is termed, lymphocyte homing). This process induces mucosal immunity at multiple distal sites. Systemic immunity is also activated by this process, but the effect is relatively weak. Therefore, activated B-cells, IgA, T-cells and DCs all constitute the mucosal defense system, and play roles in neutralizing and eliminating pathogens to promote mucosal repair.

Recent studies (Chen J, et al., 2016; Li X, et al., 2016) have shown that adjuvant CpG ODN is a ligand for TLR9, and is a good stimulant for mucosal immunity, since it can induce mucosal immunity alone. When CpG ODN is engulfed by mucosal cells, it interacts with TLR9 in the cytoplasm to form a complex that activates immune responses through a myeloid differentiation factor 88 (MyD88)-dependent pathway. MyD88 and TNF receptor associated factor 6 (TRAF6) can activate NF-kappa-B (NF-κB)-inducing kinase, which subsequently activates the inhibitor of NF-κB (IκB)

kinase (IKK). This causes the phosphorylation of I $\kappa$ B and NF- $\kappa$ B to be released into the cell nucleus and activate target genes, which activates the gene transcription of relevant cytokines. CpG ODN can also induce the transcription and expression of high levels of granulocyte colony-stimulating factor (G-CSF) (Nardini E, et al., 2005), tumor necrosis factor-alpha (TNF- $\alpha$ ), IL-6 (Zhu FG and Marshall JS, 2001) and other cytokines through other cell signaling pathways.

The intratracheal instillation of LPS into BALB/c mice was used to successfully generate the ARDS model before analyzing the protective effects of the intranasal and transrectal induction of mucosal immunity. From these pathological results, it can be observed that the intranasal administration of 50  $\mu$ g of CpG ODN after LPS immunization in mice resulted in the least severe lung tissue injury. Furthermore, IL-6 and IL-8 concentrations were lower, which was second to mice treated with the rectal administration of 20  $\mu$ g of CpG ODN. From the survival outcomes of various groups, it can be observed that mice in the nasal administration of 20  $\mu$ g of CpG ODN after LPS immunization group, rectal administration of 20  $\mu$ g of CpG ODN after LPS immunization group, and pre-nasal administration of 20  $\mu$ g of CpG ODN group all had 100% survival rates. Furthermore, mice in the blank control group, LPS only group, nasal administration of 50  $\mu$ g of CpG ODN after LPS immunization group, rectal administration of 50  $\mu$ g of CpG ODN after LPS immunization group, and pre-rectal administration of 50  $\mu$ g of CpG ODN group all had 80% survival rates, while the survival rate of the other groups was only 60%. Therefore, even though there were intergroup differences in IL-6 and IL-8, mice in the group where 50  $\mu$ g of CpG ODN was intranasally administered after LPS immunization had the most minor pathological damage and relatively good survival outcomes. In contrast, the nasal and rectal administration of CpG ODN in BALB/c mice before LPS immunization did not

appear to exhibit any significant protective effect. However, it is worth noting that regardless of the timing of CpG ODN administration, the IL-6 and IL-8 concentrations are relatively lower when CpG ODN was intrarectally administered. This may explain how mucosal immunity can correct excessive inflammatory responses in ARDS (Reiss LK, et al., 2012) , enabling the regulation of the imbalance between pro-inflammatory and anti-inflammatory responses, thereby alleviating tissue injury. This causes the levels of inflammatory mediators to decrease, which can reduce tissue damage and accelerate repair.

In conclusion, the present study demonstrates that CpG ODN has protective effects for ARDS in mice, which may be due to the stimulation of CpG ODN on the mucosa, inducing the production of large of IgA to neutralize various microorganisms, which in turn reduces inflammatory cytokines, and leads to less pathologic injury. Furthermore experiments are needed with more mice, in order to determine the protective effect of CpG ODN to exogenous ARDS.

### **Acknowledgements**

This study was supported by Science and Technology Committee of Tongzhou District, Beijing City (grant number: KJ2016CX009-08).

### **Conflict of Interest**

The authors declare that they have no conflict of interest.

## References

- Anzueto A, Baughman RP, Guntupalli KK, Weg JG, Wiedemann HP, Raventós AA, Lemaire F, Long W, Zaccardelli DS, Pattishall EN (1996). Aerosolized surfactant in adults with sepsis-induced acute respiratory distress syndrome. Exosurf Acute Respiratory Distress Syndrome Sepsis Study Group. *N Engl J Med* **334**, 1417-1421.
- Aeffner F, Bolon B, Davis IC (2015). Mouse Models of Acute Respiratory Distress Syndrome: A Review of Analytical Approaches, Pathologic Features, and Common Measurements. *Toxicol Pathol* **43**, 1074-1092.
- ARDS Definition Task Force, Ranieri VM, Rubenfeld GD, Thompson BT, Ferguson ND, Caldwell E, Fan E, Camporota L, Slutsky AS (2012). Acute respiratory distress syndrome: the Berlin Definition. *JAMA* **307**, 2526-2533.
- Ashbaugh DG, Bigelow DB, Petty TL, Levine BE (1967). Acute respiratory distress in adults. *Lancet* **2**, 319-323.
- Bellani G, Laffey JG, Pham T, Fan E, Brochard L, Esteban A, Gattinoni L, van Haren F, Larsson A, McAuley DF, Ranieri M, Rubenfeld G, Thompson BT, Wrigge H, Slutsky AS, Pesenti A; LUNG SAFE Investigators; ESICM Trials Group (2016). Epidemiology, Patterns of Care, and Mortality for Patients with Acute Respiratory Distress Syndrome in Intensive Care Units in 50 Countries. *JAMA* **315**, 788-800.
- Boyle AJ, McNamee JJ, McAuley DF (2014). Biological therapies in the acute respiratory distress syndrome. *Expert Opin Biol Ther* **14**, 969-981.
- Chen J, Tian X, Mei Z, Wang Y, Yao Y, Zhang S, Li X, Wang H, Zhang J, Xie C (2016). The effect of the TLR9 ligand CpG-oligodeoxynucleotide on



the protective immune response to radiation-induced lung fibrosis in mice. *Mol Immunol* **80**, 33-40.

Dellinger RP, Zimmerman JL, Taylor RW, Straube RC, Hauser DL, Criner GJ, Davis K Jr, Hyers TM, Papadakos P (1998). Effects of inhaled nitric oxide in patients with acute respiratory distress syndrome: results of a randomized phase II trial. *Crit Care Med* **26**, 15-23.

Dennehy PH (2005). Rotavirus vaccines: an update. *Curr Opin Pediatr* **17**, 88-92.

El Kebir D, Damlaj A, Makhezer N, Filep JG (2015). Toll-like receptor 9 signaling regulates tissue factor and tissue factor pathway inhibitor expression in human endothelial cells and coagulation in mice. *Crit Care Med* **43**, e179-e189.

Featherstone C (1997). M cell: Portals to the mucosal immune system. *Lancet* **350**, 1230.

Han S, Mallampalli RK (2015). The acute respiratory distress syndrome: from mechanism to translation. *J Immunol* **194**,855-860.

Iwata K, Doi A, Ohji G, Oka H, Oba Y, Takimoto K, Igarashi W, Gremillion DH, Shimada T (2010). Effect of neutrophil elastase inhibitor (sivelestat sodium) in the treatment of acute lung injury (ALI) and acute respiratory distress syndrome (ARDS): a systematic review and meta-analysis. *Intern Med* **49**, 2423-2432.

Katial RK, Brandt BL, Moran EE, Marks S, Agnello V, Zollinger WD (2002). Immunogenicity and safety testing of a group B intranasal meningococcal native outer membrane vesicle vaccine. *Infect Immun* **70**, 702-707.

Li Lina (2010). Effect and possible mechanism of CpG ODN on lung fibrosis, pp.

1-87. JILIN: JILIN University.

Li X, Xu G, Qiao T, Yuan S, Zhuang X (2016). Effects of CpG oligodeoxynucleotide 1826 on acute radiation-induced lung injury in mice. *Biol Res* **49**, 8.

Li Xuan (2014). Effect of CpG-ODN1826 to Radiation-Induced Lung Injury in Mice, pp. 1-73. SHANGHAI: FUDAN University.

Lundholm P (2002). DNA mucosal HIV vaccine in humans. *Virus Res* **82**, 141-145.

Maxim RB (2002). Immunization update, 2002. *Med Health R I* **85**, 287-288.

Nardini E, Morelli D, Aiello P, Besusso D, Calcaterra C, Mariani L, Palazzo M, Vecchi A, Paltrinieri S, Menard S, Balsari A (2005). CpG-oligodeoxynucleotides induce mobilization of hematopoietic progenitor cells into peripheral blood in association with mouse KC (IL-8) production. *J Cell Physiol* **204**, 889-895.

National Heart, Lung, and Blood Institute Acute Respiratory Distress Syndrome (ARDS) Clinical Trials Network, Matthay MA, Brower RG, Carson S, Douglas IS, Eisner M, Hite D, Holets S, Kallet RH, Liu KD, MacIntyre N, Moss M, Schoenfeld D, Steingrub J, Thompson BT (2011). Randomized, placebo-controlled clinical trial of an aerosolized  $\beta_2$ -agonist for treatment of acute lung injury. *Am J Resp Crit Care Med* **184**, 561-568.

National Heart, Lung, and Blood Institute ARDS Clinical Trials Network, Truwit JD, Bernard GR, Steingrub J, Matthay MA, Liu KD, Albertson TE, Brower RG, Shanholtz C, Rock P, Douglas IS, deBoisblanc BP, Hough CL, Hite RD, Thompson BT (2014). Rosuvastatin for sepsis-associated acute respiratory distress syndrome. *N*

Engl J Med **370**, 2191-2200.

Paine R 3rd, Standiford TJ, Dechert RE, Moss M, Martin GS, Rosenberg AL, Thannickal VJ, Burnham EL, Brown MB, Hyzy RC (2012). A randomized trial of recombinant human granulocyte-macrophage colony stimulating factor for patients with acute lung injury. *Crit Care Med* **40**, 90-97.

Peter JV, John P, Graham PL, Moran JL, George IA, Bersten A (2008). Corticosteroids in the prevention and treatment of acute respiratory distress syndrome (ARDS) in adults: meta-analysis. *BMJ* **336**, 1006-1009.

Reiss LK, Uhlig U, Uhlig S (2012). Models and mechanisms of acute lung injury caused by direct insults. *Eur J Cell Biol* **91**, 590-601.

Rice TW, Wheeler AP, Thompson BT, deBoisblanc BP, Steingrub J, Rock P; NIH NHLBI Acute Respiratory Distress Syndrome Network of Investigators (2011). Enteral omega-3 fatty acid, gamma-linolenic acid, and antioxidant supplementation in acute lung injury. *JAMA* **306**, 1574-1581.

Rubinfeld GD, Caldwell E, Peabody E, Weaver J, Martin DP, Neff M, Stern EJ, Hudson LD (2005). Incidence and outcomes of acute lung injury. *N Engl J Med* **353**, 1685-1693.

Zhu FG, Marshall JS (2001). CpG-containing oligodeoxynucleotides induce TNF- $\alpha$  and IL-6 production but not degranulation from murine bone marrow-derived mast cells. *J Leukoc Biol* **69**, 253-262.



Table 1 each group immunization mode on experiment

| Group | Dose of CpG ODN | Mode                |
|-------|-----------------|---------------------|
| A     | /               | Blank Control       |
| B     | /               | LPS only            |
| C     | 20ug            | intranasal          |
| D     | 50ug            | intranasal          |
| E     | 20ug            | transrectal         |
| F     | 50ug            | transrectal         |
| G     | 20ug            | Intranasal/Pre-LPS  |
| H     | 50ug            | intranasal/Pre-LPS  |
| I     | 20ug            | transrectal/Pre-LPS |
| J     | 50ug            | transrectal/Pre-LPS |

Table 2 Modified grading scheme of Matute-Bello(Chen J, et al., 2016)

| Parameter                                                                                  | Score per field |       |     |
|--------------------------------------------------------------------------------------------|-----------------|-------|-----|
|                                                                                            | 0               | 1     | 2   |
| Neutrophils in the alveolar space                                                          | None            | 1-5   | >5  |
| Neutrophils in the interstitial space                                                      | None            | 1-5   | >5  |
| Proteinaceous debris filling the airspaces                                                 | None            | 1     | >1  |
| Alveolar septal thickening                                                                 | <2×             | 2×-4× | >4× |
| Total score= [(20×S) +(14×T) + (7×U) + (2 ×V)]/number of high<br>power fields counted ×72) |                 |       |     |

Table 3 Pathological evaluation scores for lung tissues in various groups of mice

| Group | Neutrophils<br>in<br>the<br>alveolar<br>cavity | Neutrophils in<br>the interstitial<br>spaces | Protein<br>deposition<br>in<br>air<br>spaces | Alveolar septal<br>thickness | Total<br>score* |
|-------|------------------------------------------------|----------------------------------------------|----------------------------------------------|------------------------------|-----------------|
| A     | 0                                              | 1                                            | 0                                            | 0                            | 0.0243          |
| B     | 2                                              | 2                                            | 2                                            | 2                            | 0.1493          |
| C     | 1                                              | 2                                            | 1                                            | 1                            | 0.0990          |
| D     | 1                                              | 1                                            | 0                                            | 1                            | 0.0625          |
| E     | 1                                              | 1                                            | 1                                            | 1                            | 0.0781          |
| F     | 1                                              | 2                                            | 1                                            | 2                            | 0.1024          |
| G     | 1                                              | 2                                            | 0                                            | 1                            | 0.0990          |
| H     | 1                                              | 1                                            | 1                                            | 1                            | 0.0746          |
| I     | 1                                              | 2                                            | 1                                            | 1                            | 0.0876          |
| J     | 1                                              | 2                                            | 1                                            | 2                            | 0.0793          |

\*: Mean evaluation score values for surviving mice in each group

Table 4 Comparison of IL-6 levels in various groups of mice before and after immunization

|                                             | 20 µg CpG  |        | 50 µg CpG |        | Pre-nasal      |                | Pre-rectal     |                |          |          |
|---------------------------------------------|------------|--------|-----------|--------|----------------|----------------|----------------|----------------|----------|----------|
|                                             | nasal      | nasal  | rectal    | rectal | administration | administration | administration | administration |          |          |
| Blank Control                               | only       | only   | only      | only   | only           | only           | only           | only           |          |          |
| Pre-immunization IL-6 concentration (ng/L)  | 4.3792     | 3.7745 | 8.7735    | 9.6625 | 10.062         | 7.12179        | 1.03549        | 3.31549        | 5.29761  | 6.55339  |
| Post-immunization IL-6 concentration (ng/L) | 30.992     | 110.11 | 77.309    | 47.533 | 36.535         | 47.1413        | 56.184500      | 67.95400       | 53.90540 | 46.26640 |
| <i>P</i> value                              | 0.013<0.05 |        |           |        |                |                |                |                |          |          |



Table 5 Comparison of IL-8 levels in various groups of mice before and after immunization

|                   | 20 µg CpG                 |       |        |        | 50 µg CpG |       |        |        | Pre-nasal                   | Pre-rectal                  |
|-------------------|---------------------------|-------|--------|--------|-----------|-------|--------|--------|-----------------------------|-----------------------------|
|                   | nasal                     | nasal | rectal | rectal | nasal     | nasal | rectal | rectal | administration of 20 µg CpG | administration of 50 µg CpG |
| Blank only        |                           |       |        |        |           |       |        |        |                             |                             |
| Control           |                           |       |        |        |           |       |        |        |                             |                             |
| Pre-immunization  | IL-8 concentration (ng/L) |       |        |        |           |       |        |        |                             |                             |
|                   | 0.17                      | 0.17  | 0.21   | 0.19   | 0.49      | 0.20  | 0.14   | 0.20   | 0.14                        | 0.20                        |
|                   | 459                       | 46    | 5      | 8      | 0.39      | 0.57  | 0.21   | 0.54   | 0.19                        | 0.99                        |
|                   | 5                         | 8     | 0.39   | 0.57   | 0.21      | 0.54  | 0.19   | 0.99   | 5                           | 0.22                        |
|                   | 396                       | 0.19  | 0.86   |        |           |       |        |        |                             |                             |
| Post-immunization | IL-8 concentration (ng/L) |       |        |        |           |       |        |        |                             |                             |
|                   | 0.59                      | 0.88  | 0.75   | 0.76   | 2.4       | 1.7   | 2.3    | 1.7    | 2.3                         | 2.4                         |
|                   | 718                       | 29    | 2      | 6      | 0.91      | 0.70  | 0.90   | 0.63   | 2.81                        | 8                           |
|                   | 0.38                      | 0.33  | 0.45   | 0.64   |           |       |        |        |                             |                             |
| <i>P</i> value    | <0.01                     |       |        |        |           |       |        |        |                             |                             |

## **Figure legends**

### **Fig. 1: Gross appearance of lung tissue and pathology.**

Fig. 1A: Gross appearance of both lungs isolated from BALB/c mice after the experiment

Fig. 1B: Alveolar and interstitial edema, congestion, and neutrophil infiltration in the right lung of BALB/c mice; pink protein-like substance deposition in the alveolar cavity can be seen.

### **Fig. 2: The display of pathological test results in control groups and LPS-only groups.**

Fig. 2A, 2B and 2C mean control groups which pathological manifestation is present by 100×, 200× and 400× magnified, respectively. The lung tissue structure was clear, the alveolar cavity was clean, the alveolar septum was thin, and there was an absence of interstitial congestion, an absence of neutrophil elevation and migration, and an absence of protein-like substance deposition; Fig. 2D, 2E and 2F mean LPS-only groups which pathological manifestation is present by 100×, 200× and 400× magnified, respectively. It can be seen that the normal structure of the lung tissues had nearly disappeared, the alveolar cavity was significantly reduced or was filled with pink protein-like substances, the alveolar septum was significantly thickened (thickness increased by more than 4 times compared with group A), and there was interstitial congestion and large amounts of neutrophil exudates.

### **Fig. 3: The display of pathological test results among group C~J.**

Fig. 3A~3H present the pathological test results among group C~J in 400x

microscope display, respectively. In group C and group D, the overall lung structure was more obvious damaged than that of group A, but significantly lighter than group B. The structure of the lungs of the two groups remained substantially intact (a small part of the alveolar structure was seen to be destroyed), there was only a very small amount of neutrophils in the alveolar space, and the alveolar septum was slightly thickened (2-4 times the thickness in group A). Mild hyperemia and a small amount of neutrophil exudate were seen. However, overall, pathological lesions in group D were slightly milder than those in group C; pathological findings in group E were similar to those in group D; while those in group F were similar to those in group C, but neutrophil exudation, alveolar septum in alveolar spaces, the thickness and interstitial hyperemia were slightly greater than in group C. The overall pathological score of group G ~ J was better than that of group C ~ F. However, compared with the four groups, the protein deposits in the alveolar space of the G group were significantly more than the other three groups(H ~ J), while the lung interstitial lesions and alveolar septum thickening in the group J were better than the other three groups.

**Fig. 4: Comparison of IL-6 and IL-8 levels among groups.**

Fig. 4A: Comparison of IL-6 levels in various groups of mice before and after immunization.

Fig. 4B: Comparison of IL-8 levels in various groups of mice before and after immunization.

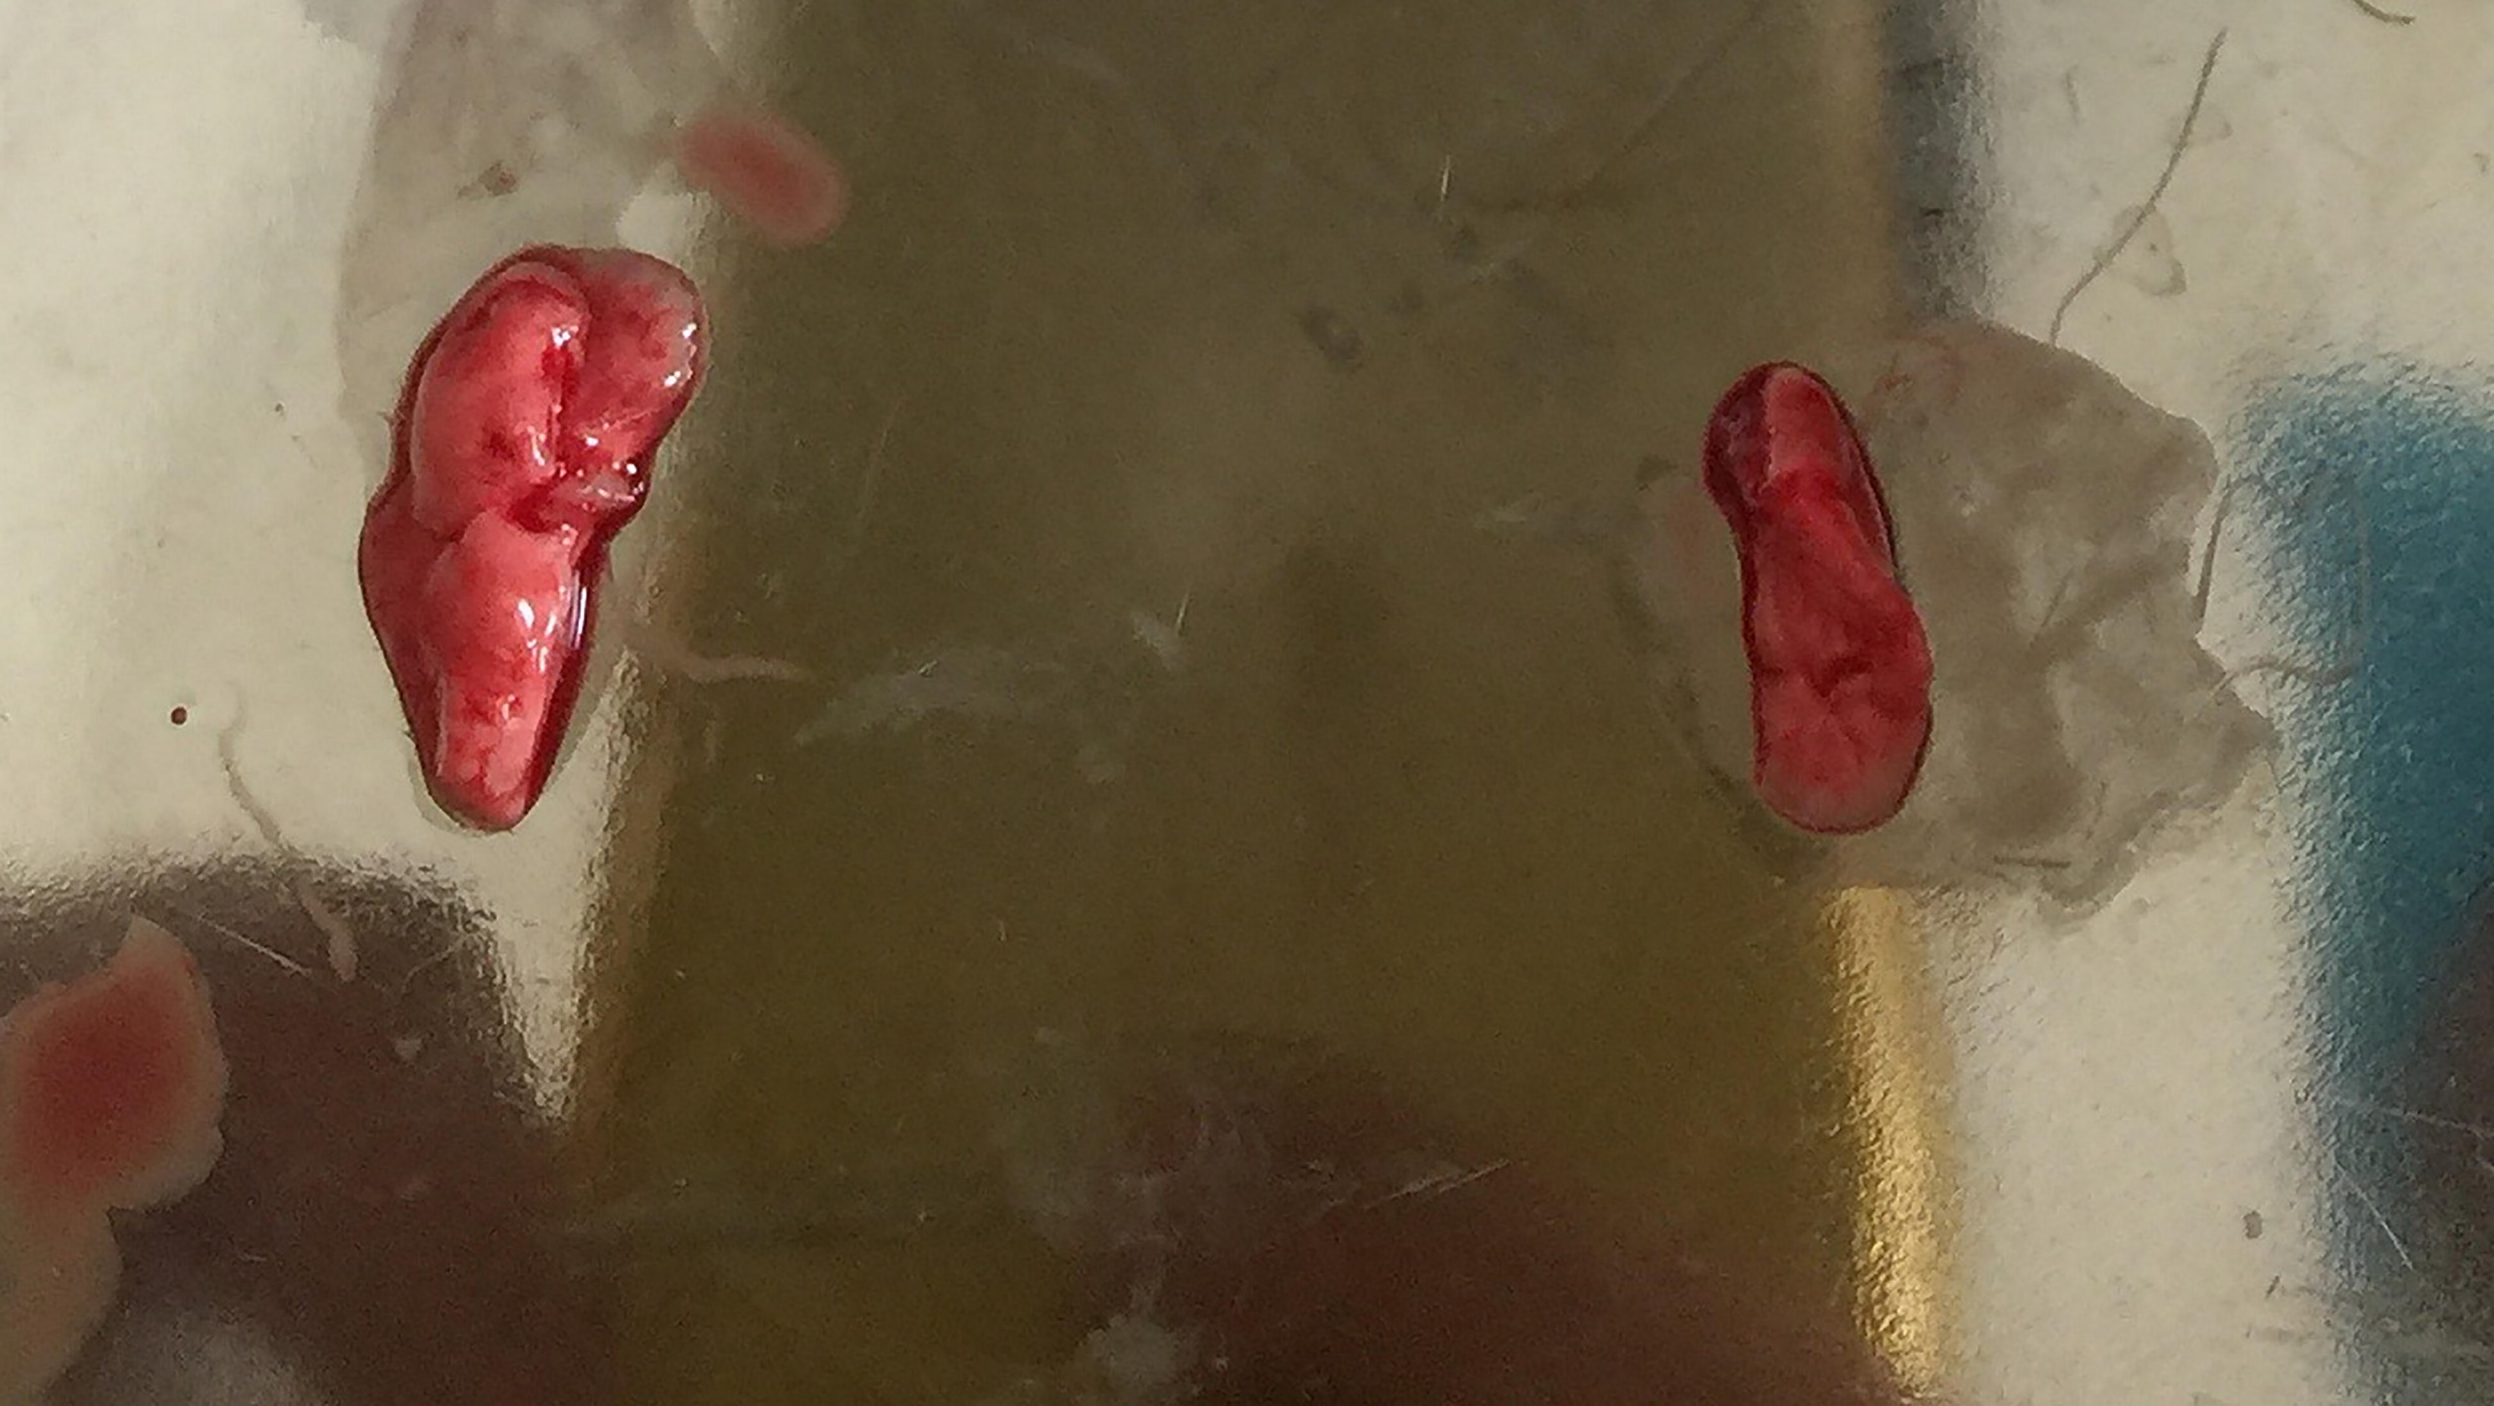



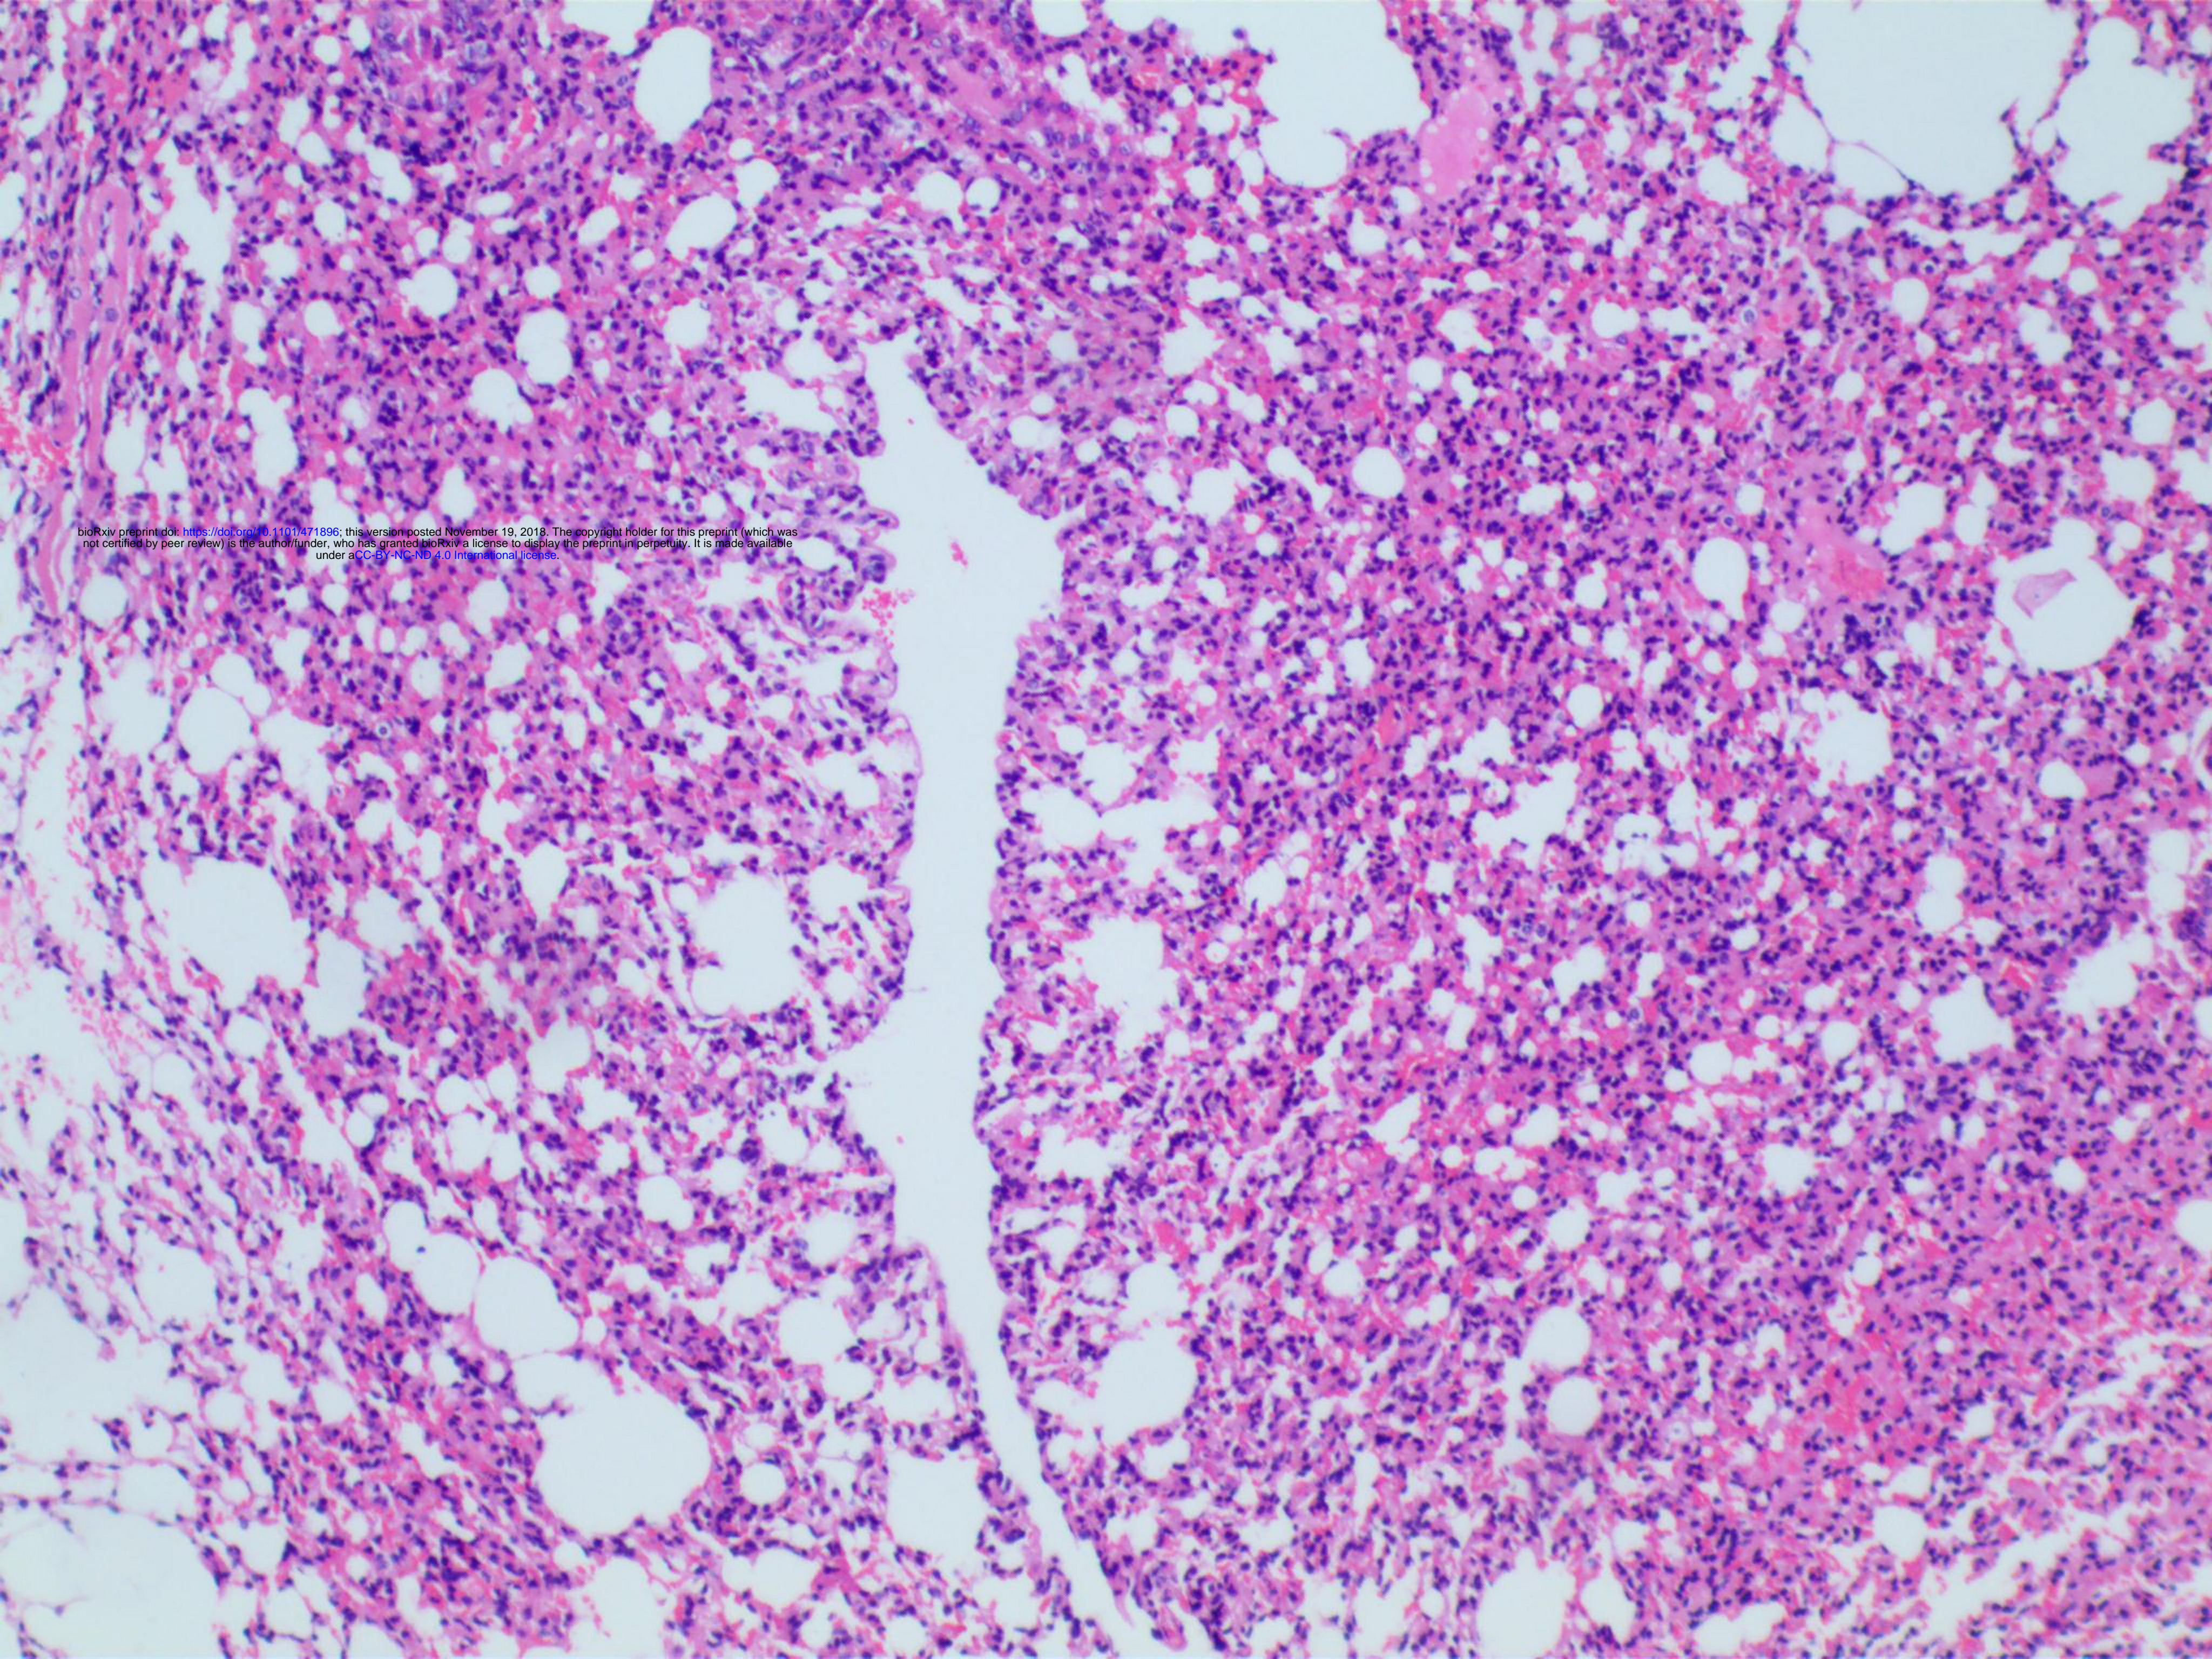

bioRxiv preprint doi: <https://doi.org/10.1101/471896>; this version posted November 19, 2018. The copyright holder for this preprint (which was not certified by peer review) is the author/funder, who has granted bioRxiv a license to display the preprint in perpetuity. It is made available under aCC-BY-NC-ND 4.0 International license.



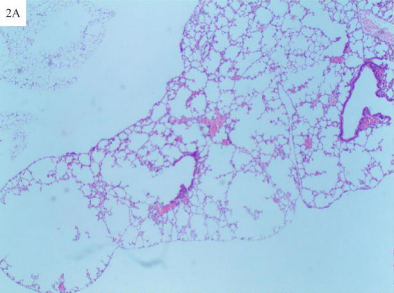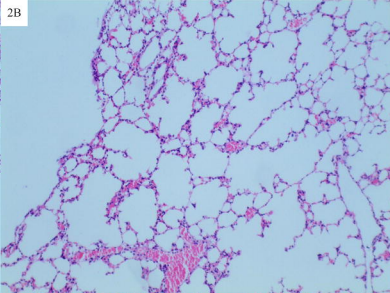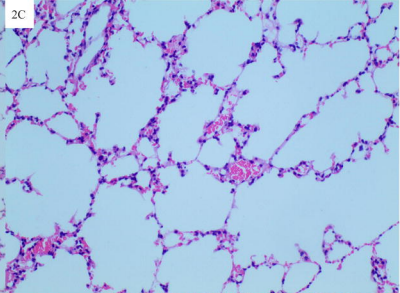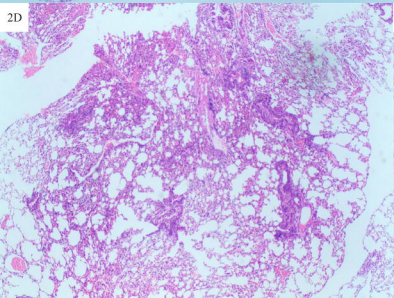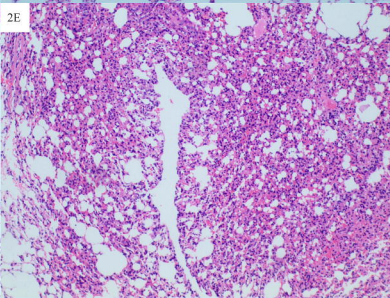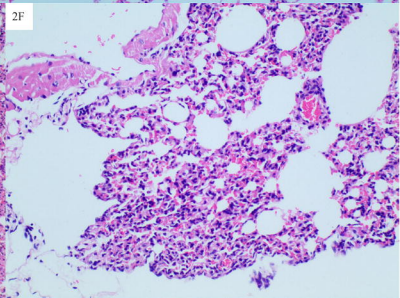

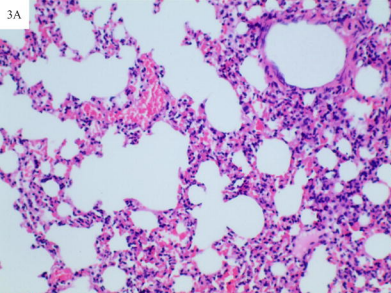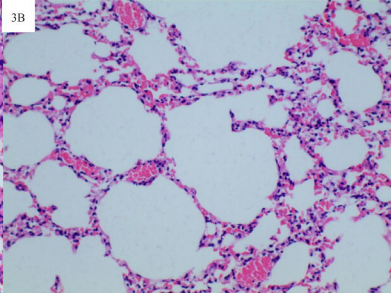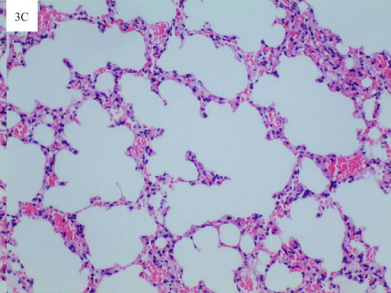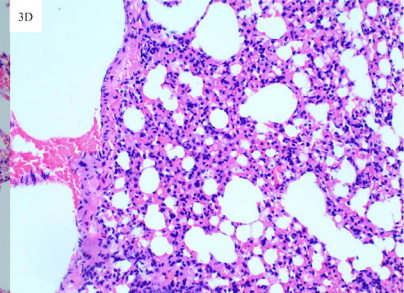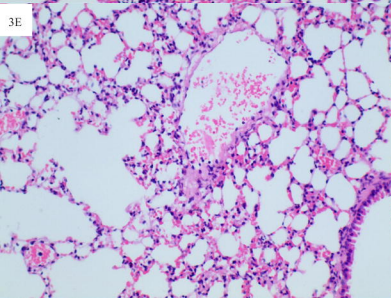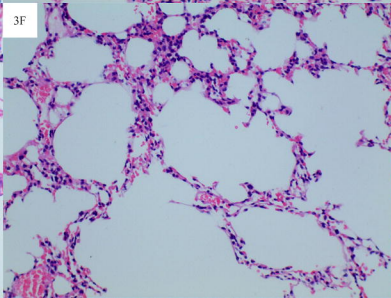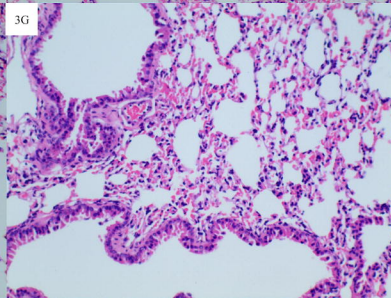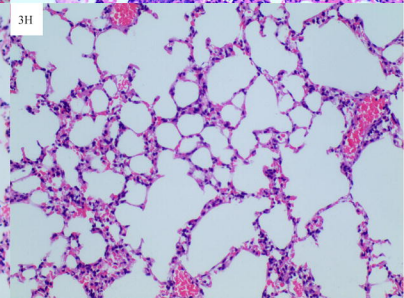

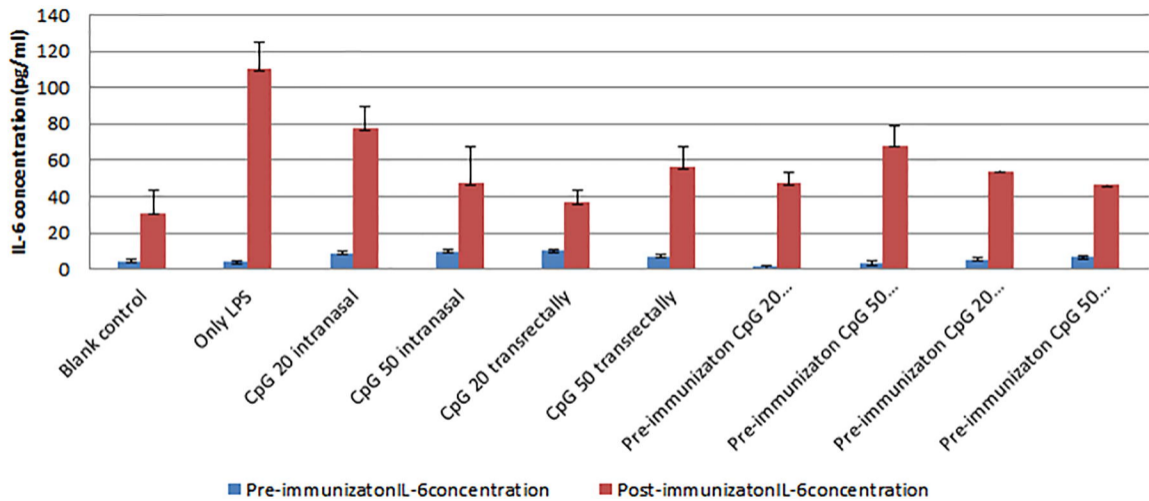

Source: http://biorxiv.org/content/10.1101/471896v1.full.pdf
